# Supplementary material
Source: publisher site journal article supplement (https://www.dovepress.com/article/538773)
Supplement: Supplementary file 1 [file 538773%20Revised%20Supplementary%20Table%20S1.docx]

Supplementary Table S1. Sensitivity analysis comparing included and excluded participants.

|  | CHM use | | *p* |
| --- | --- | --- | --- |
|  | Excluded (n=107) | Included (n=4,511) |  |
| Age |  |  | <0.001 |
| middle-aged adults | 50 (46.73) | 2,068 (45.84) |  |
| older adults | 49 (45.79) | 2,370 (52.54) |  |
| Missing | 8 ( 7.48) | 73 ( 1.62) |  |
| Gender |  |  | 0.74 |
| Male | 47 (43.93) | 1,909 (42.32) |  |
| Female | 60 (56.07) | 2,602 (57.68) |  |
| Education level |  |  | 0.21 |
| Illiterate | 32 (29.91) | 1,112 (24.65) |  |
| Not illiterate | 75 (70.09) | 3,399 (75.35) |  |
| Area of residence |  |  | 0.19 |
| Village | 76 (71.03) | 3,452 (76.52) |  |
| Urban | 31 (28.97) | 1,059 (23.48) |  |
| Marital Status |  |  | 0.019 |
| Married | 71 (66.36) | 3,435 (76.15) |  |
| Other | 36 (33.64) | 1,076 (23.85) |  |
| Receive Income |  |  | <0.001 |
| Yes | 11 (10.28) | 647 (14.34) |  |
| No | 62 (57.94) | 3,856 (85.48) |  |
| Missing | 34 (31.78) | 8 ( 0.18) |  |
| Smoking status |  |  | <0.001 |
| Never | 25 (23.36) | 2,687 (59.57) |  |
| Ever smoker | 8 ( 7.48) | 884 (19.60) |  |
| Current smoker | 8 ( 7.48) | 936 (20.75) |  |
| Missing | 66 (61.68) | 4 ( 0.09) |  |
| Alcohol consumption |  |  | <0.001 |
| Never drinker | 31 (28.97) | 3,093 (68.57) |  |
| Former drinker | 0 ( 0.00) | 238 ( 5.28) |  |
| Current drinker | 10 ( 9.35) | 1,176 (26.07) |  |
| Missing | 66 (61.68) | 4 ( 0.09) |  |
| Insurance status |  |  | <0.001 |
| Yes | 74 (69.16) | 4,397 (97.47) |  |
| No | 8 ( 7.48) | 107 ( 2.37) |  |
| Missing | 25 (23.36) | 7 ( 0.16) |  |
| General Hospital |  |  | 0.058 |
| No | 102 (95.33) | 4,048 (89.74) |  |
| Yes | 5 ( 4.67) | 463 (10.26) |  |
| Specialized Hospital |  |  | 0.29 |
| No | 107 (100.00) | 4,464 (98.96) |  |
| Yes | 0 ( 0.00) | 47 ( 1.04) |  |
| Chinese Medicine Hospital |  |  | 0.14 |
| No | 107 (100.00) | 4,422 (98.03) |  |
| Yes | 0 ( 0.00) | 89 ( 1.97) |  |
| Self-treatment |  |  | <0.001 |
| No | 32 (29.91) | 1,233 (27.33) |  |
| Yes | 46 (42.99) | 3,268 (72.45) |  |
| Missing | 29 (27.10) | 10 ( 0.22) |  |
| General health status |  |  | <0.001 |
| Good | 9 ( 8.41) | 451 (10.00) |  |
| Not good | 32 (29.91) | 3,664 (81.22) |  |
| Missing | 66 (61.68) | 396 ( 8.78) |  |
| Hypertension |  |  | <0.001 |
| No | 104 (97.20) | 3,881 (86.03) |  |
| Yes | 3 ( 2.80) | 630 (13.97) |  |
| Dyslipidemia |  |  | 0.002 |
| No | 102 (95.33) | 3,803 (84.31) |  |
| Yes | 5 ( 4.67) | 708 (15.69) |  |
| Diabetes |  |  | 0.036 |
| No | 104 (97.20) | 4,128 (91.51) |  |
| Yes | 3 ( 2.80) | 383 ( 8.49) |  |
| Cancer |  |  | 0.20 |
| No | 107 (100.00) | 4,442 (98.47) |  |
| Yes | 0 ( 0.00) | 69 ( 1.53) |  |
| Chronic Lung Diseases |  |  | 0.018 |
| No | 105 (98.13) | 4,144 (91.86) |  |
| Yes | 2 ( 1.87) | 367 ( 8.14) |  |
| Liver Disease |  |  | 0.10 |
| No | 105 (98.13) | 4,265 (94.55) |  |
| Yes | 2 ( 1.87) | 246 ( 5.45) |  |
| Heart Attack |  |  | <0.001 |
| No | 107 (100.00) | 864 (19.15) |  |
| Yes | 0 ( 0.00) | 3,647 (80.85) |  |
| Stroke |  |  | <0.001 |
| No | 107 (100.00) | 3,540 (78.47) |  |
| Yes | 0 ( 0.00) | 971 (21.53) |  |
| Kidney disease |  |  | 0.20 |
| No | 103 (96.26) | 4,201 (93.13) |  |
| Yes | 4 ( 3.74) | 310 ( 6.87) |  |
| Stomach Disease |  |  | 0.013 |
| No | 104 (97.20) | 4,059 (89.98) |  |
| Yes | 3 ( 2.80) | 452 (10.02) |  |
| Emotional Problems |  |  | 0.086 |
| No | 107 (100.00) | 4,390 (97.32) |  |
| Yes | 0 ( 0.00) | 121 ( 2.68) |  |
| Memory-Related Disease |  |  | 0.025 |
| No | 106 (99.07) | 4,234 (93.86) |  |
| Yes | 1 ( 0.93) | 277 ( 6.14) |  |
| Arthritis |  |  | 0.011 |
| No | 105 (98.13) | 4,109 (91.09) |  |
| Yes | 2 ( 1.87) | 402 ( 8.91) |  |
| Asthma |  |  | 0.091 |
| No | 106 (99.07) | 4,320 (95.77) |  |
| Yes | 1 ( 0.93) | 191 ( 4.23) |  |
| Depression |  |  | <0.001 |
| No | 27 (25.23) | 2,399 (53.18) |  |
| Yes | 30 (28.04) | 1,677 (37.18) |  |
| Missing | 50 (46.73) | 435 ( 9.64) |  |
| satisfaction |  |  | <0.001 |
| No | 45 (42.06) | 3,434 (76.13) |  |
| Yes | 12 (11.21) | 642 (14.23) |  |
| Missing | 50 (46.73) | 435 ( 9.64) |  |
